# Supplementary material for: Technological and Genomic Analysis of Roles of the Cell-Envelope Protease PrtS in Yoghurt Starter Development
Source: PubMed Central journal article supplement (PMC5979370; doi:10.3390/ijms19041068), 2018-04-03
Supplement: ijms-19-01068-s001.pdf [file ijms-19-01068-s001.pdf]

**Table S1** The genomic islands of *S. thermophilus* KLDS SM

| Start  | End    | Locus         | Gene start | Gene end | Product                                             |
|--------|--------|---------------|------------|----------|-----------------------------------------------------|
| 53781  | 61460  | A9497_RS00270 | 53781      | 53969    | hypothetical protein                                |
| 53781  | 61460  | A9497_RS00275 | 54248      | 54523    | hypothetical protein                                |
| 53781  | 61460  | A9497_RS00280 | 54540      | 54725    | hypothetical protein                                |
| 53781  | 61460  | A9497_RS00285 | 55023      | 56528    | DNA primase                                         |
| 53781  | 61460  | A9497_RS00290 | 56518      | 57378    | hypothetical protein                                |
| 53781  | 61460  | A9497_RS00295 | 57393      | 57665    | hypothetical protein                                |
| 53781  | 61460  | A9497_RS00300 | 57908      | 58144    | hypothetical protein                                |
| 53781  | 61460  | A9497_RS00305 | 58158      | 58352    | hypothetical protein                                |
| 53781  | 61460  | A9497_RS00310 | 58356      | 58649    | hypothetical protein                                |
| 53781  | 61460  | A9497_RS00315 | 58888      | 59085    | transcriptional regulator                           |
| 53781  | 61460  | A9497_RS00320 | 59248      | 59496    | Cro/C1 family transcriptional regulator             |
| 53781  | 61460  | A9497_RS00325 | 59843      | 61009    | integrase                                           |
| 53781  | 61460  | A9497_RS00330 | 61125      | 61460    | hypothetical protein                                |
| 115340 | 133684 | A9497_RS00605 | 115340     | 116209   | transposase                                         |
| 115340 | 133684 | A9497_RS00610 | 116224     | 116910   | transposase                                         |
| 115340 | 133684 | A9497_RS00615 | 117105     | 118282   | transposase                                         |
| 115340 | 133684 | A9497_RS00620 | 118403     | 120493   | copper-translocating P-type ATPase                  |
| 115340 | 133684 | A9497_RS00625 | 120684     | 121858   | transposase                                         |
| 115340 | 133684 | A9497_RS00630 | 122053     | 122809   | type I restriction endonuclease                     |
| 115340 | 133684 | A9497_RS00635 | 123704     | 124615   | cysteine synthase                                   |
| 115340 | 133684 | A9497_RS00640 | 124637     | 125821   | cystathionine beta-lyase                            |
| 115340 | 133684 | A9497_RS00645 | 125904     | 126131   | serine acetyltransferase                            |
| 115340 | 133684 | A9497_RS00650 | 126872     | 128046   | transposase                                         |
| 115340 | 133684 | A9497_RS00655 | 128159     | 129046   | sugar transporter                                   |
| 115340 | 133684 | A9497_RS00660 | 129662     | 129856   | hypothetical protein                                |
| 115340 | 133684 | A9497_RS00665 | 129925     | 130368   | restriction endonuclease subunit M                  |
| 115340 | 133684 | A9497_RS00670 | 130678     | 131370   | protease PrsW                                       |
| 115340 | 133684 | A9497_RS00675 | 131527     | 133071   | zinc ABC transporter substrate-binding protein AdcA |
| 115340 | 133684 | A9497_RS00680 | 133286     | 133684   | hypothetical protein                                |
| 122053 | 128046 | A9497_RS00630 | 122053     | 122809   | type I restriction endonuclease                     |
| 122053 | 128046 | A9497_RS00635 | 123704     | 124615   | cysteine synthase                                   |
| 122053 | 128046 | A9497_RS00640 | 124637     | 125821   | cystathionine beta-lyase                            |
| 122053 | 128046 | A9497_RS00645 | 125904     | 126131   | serine acetyltransferase                            |
| 122053 | 128046 | A9497_RS00650 | 126872     | 128046   | transposase                                         |
| 169624 | 176090 | A9497_RS00875 | 169624     | 170481   | MutR family transcriptional regulator               |
| 169624 | 176090 | A9497_RS00880 | 170541     | 171299   | Fe-S oxidoreductase                                 |
| 169624 | 176090 | A9497_RS00885 | 171334     | 172509   | transposase                                         |
| 169624 | 176090 | A9497_RS00890 | 173074     | 174171   | radical SAM/SPASM domain-containing protein         |
| 169624 | 176090 | A9497_RS00895 | 174168     | 174911   | agmatinase                                          |
| 169624 | 176090 | A9497_RS00900 | 174918     | 176090   | MFS transporter                                     |

|        |        |               |        |        |                                                   |
|--------|--------|---------------|--------|--------|---------------------------------------------------|
| 271805 | 280214 | A9497_RS01390 | 271432 | 272373 | subtype I-E CRISPR-associated endonuclease Cas1   |
| 271805 | 280214 | A9497_RS01395 | 272377 | 273015 | type I-E CRISPR-associated protein Cas6/Cse3/CasE |
| 271805 | 280214 | A9497_RS01400 | 273020 | 273745 | type I-E CRISPR-associated protein Cas5/CasD      |
| 271805 | 280214 | A9497_RS01405 | 273759 | 274826 | type I-E CRISPR-associated protein Cas7/Cse4/CasC |
| 271805 | 280214 | A9497_RS01410 | 274816 | 275409 | type I-E CRISPR-associated protein Cse2/CasB      |
| 271805 | 280214 | A9497_RS01415 | 275419 | 277086 | type I-E CRISPR-associated protein Cse1/CasA      |
| 271805 | 280214 | A9497_RS01420 | 277073 | 279853 | CRISPR-associated helicase/endonuclease Cas3      |
| 271805 | 280214 | A9497_RS01425 | 280150 | 282093 | hypothetical protein                              |
| 516264 | 521871 | A9497_RS02645 | 516264 | 517493 | MFS transporter permease                          |
| 516264 | 521871 | A9497_RS02650 | 517471 | 519804 | oligoendopeptidase F                              |
| 516264 | 521871 | A9497_RS02655 | 520178 | 521053 | XRE family transcriptional regulator              |
| 516264 | 521871 | A9497_RS02660 | 521182 | 521587 | DNA mismatch repair protein MutT                  |
| 516264 | 521871 | A9497_RS02665 | 521587 | 521871 | hypothetical protein                              |
| 562306 | 569987 | A9497_RS02885 | 562306 | 562980 | peptide ABC transporter ATP-binding protein       |
| 562306 | 569987 | A9497_RS02890 | 563723 | 563992 | hypothetical protein                              |
| 562306 | 569987 | A9497_RS02895 | 564152 | 564451 | hypothetical protein                              |
| 562306 | 569987 | A9497_RS02900 | 564551 | 565462 | sodium transporter                                |
| 562306 | 569987 | A9497_RS02905 | 565459 | 565781 | hypothetical protein                              |
| 562306 | 569987 | A9497_RS02910 | 565778 | 566353 | SPASM domain-containing protein                   |
| 562306 | 569987 | A9497_RS02915 | 566474 | 567565 | transporter                                       |
| 562306 | 569987 | A9497_RS02920 | 567562 | 568882 | KxxxW cyclic peptide radical SAM maturase         |
| 562306 | 569987 | A9497_RS02925 | 569127 | 569987 | MutR family transcriptional regulator             |
| 564552 | 569061 | A9497_RS02900 | 564551 | 565462 | sodium transporter                                |
| 564552 | 569061 | A9497_RS02905 | 565459 | 565781 | hypothetical protein                              |
| 564552 | 569061 | A9497_RS02910 | 565778 | 566353 | SPASM domain-containing protein                   |
| 564552 | 569061 | A9497_RS02915 | 566474 | 567565 | transporter                                       |
| 564552 | 569061 | A9497_RS02920 | 567562 | 568882 | KxxxW cyclic peptide radical SAM maturase         |
| 837601 | 844715 | A9497_RS04255 | 837601 | 838287 | transposase                                       |
| 837601 | 844715 | A9497_RS04260 | 838302 | 839171 | transposase                                       |
| 837601 | 844715 | A9497_RS04265 | 839317 | 839571 | hypothetical protein                              |
| 837601 | 844715 | A9497_RS04270 | 839822 | 840223 | hypothetical protein                              |
| 837601 | 844715 | A9497_RS04275 | 840817 | 841032 | hypothetical protein                              |
| 837601 | 844715 | A9497_RS04280 | 841228 | 841458 | bacteriocin                                       |
| 837601 | 844715 | A9497_RS04285 | 841814 | 842014 | hypothetical protein                              |
| 837601 | 844715 | A9497_RS04290 | 842033 | 842209 | bacteriocin                                       |
| 837601 | 844715 | A9497_RS04295 | 842465 | 843196 | DNA-binding response regulator                    |
| 837601 | 844715 | A9497_RS04300 | 843196 | 844536 | histidine kinase                                  |
| 837601 | 844715 | A9497_RS04305 | 844554 | 844715 | bacteriocin leader domain-containing protein      |
| 942826 | 951515 | A9497_RS04755 | 942315 | 942850 | transposase                                       |

|         |         |               |         |         |                                                  |
|---------|---------|---------------|---------|---------|--------------------------------------------------|
| 942826  | 951515  | A9497_RS04760 | 942826  | 943164  | transposase                                      |
| 942826  | 951515  | A9497_RS04765 | 943178  | 943636  | transposase                                      |
| 942826  | 951515  | A9497_RS04770 | 943748  | 944332  | transposase                                      |
| 942826  | 951515  | A9497_RS04775 | 944500  | 945003  | transposase                                      |
| 942826  | 951515  | A9497_RS04780 | 945038  | 946048  | type I glyceraldehyde-3-phosphate dehydrogenase  |
| 942826  | 951515  | A9497_RS04785 | 946235  | 948316  | elongation factor G                              |
| 942826  | 951515  | A9497_RS04790 | 948537  | 949007  | 30S ribosomal protein S7                         |
| 942826  | 951515  | A9497_RS04795 | 949026  | 949439  | 30S ribosomal protein S12                        |
| 942826  | 951515  | A9497_RS04800 | 949656  | 950480  | pur operon repressor                             |
| 942826  | 951515  | A9497_RS04805 | 950574  | 951515  | 3'-5' exoribonuclease YhaM                       |
| 942826  | 951515  | A9497_RS04810 | 951505  | 952779  | DNA polymerase V                                 |
| 1050630 | 1054700 | A9497_RS05370 | 1050005 | 1051600 | type I restriction-modification system subunit M |
| 1050630 | 1054700 | A9497_RS05375 | 1051600 | 1054677 | DEAD/DEAH box helicase                           |
| 1050630 | 1054700 | A9497_RS05380 | 1054688 | 1054981 | hypothetical protein                             |
| 1060633 | 1096101 | A9497_RS05420 | 1060633 | 1061319 | transposase                                      |
| 1060633 | 1096101 | A9497_RS05425 | 1061517 | 1061903 | 50S ribosomal protein L17                        |
| 1060633 | 1096101 | A9497_RS05430 | 1061921 | 1062859 | DNA-directed RNA polymerase subunit alpha        |
| 1060633 | 1096101 | A9497_RS05435 | 1062908 | 1063291 | 30S ribosomal protein S11                        |
| 1060633 | 1096101 | A9497_RS05440 | 1063319 | 1063684 | 30S ribosomal protein S13                        |
| 1060633 | 1096101 | A9497_RS05445 | 1063844 | 1064062 | translation initiation factor IF-1               |
| 1060633 | 1096101 | A9497_RS05450 | 1064180 | 1064836 | adenylate kinase                                 |
| 1060633 | 1096101 | A9497_RS05455 | 1064968 | 1066263 | preprotein translocase subunit SecY              |
| 1060633 | 1096101 | A9497_RS05460 | 1066280 | 1066720 | 50S ribosomal protein L15                        |
| 1060633 | 1096101 | A9497_RS05465 | 1066848 | 1067030 | 50S ribosomal protein L30                        |
| 1060633 | 1096101 | A9497_RS05470 | 1067045 | 1067539 | 30S ribosomal protein S5                         |
| 1060633 | 1096101 | A9497_RS05475 | 1067558 | 1067914 | 50S ribosomal protein L18                        |
| 1060633 | 1096101 | A9497_RS05480 | 1068004 | 1068540 | 50S ribosomal protein L6                         |
| 1060633 | 1096101 | A9497_RS05485 | 1068667 | 1069065 | 30S ribosomal protein S8                         |
| 1060633 | 1096101 | A9497_RS05490 | 1069188 | 1069373 | 30S ribosomal protein S14 type Z                 |
| 1060633 | 1096101 | A9497_RS05495 | 1069391 | 1069933 | 50S ribosomal protein L5                         |
| 1060633 | 1096101 | A9497_RS05500 | 1069960 | 1070265 | 50S ribosomal protein L24                        |
| 1060633 | 1096101 | A9497_RS05505 | 1070346 | 1070714 | 50S ribosomal protein L14                        |
| 1060633 | 1096101 | A9497_RS05510 | 1070739 | 1070999 | 30S ribosomal protein S17                        |
| 1060633 | 1096101 | A9497_RS05515 | 1071027 | 1071233 | 50S ribosomal protein L29                        |
| 1060633 | 1096101 | A9497_RS05520 | 1071243 | 1071656 | 50S ribosomal protein L16                        |
| 1060633 | 1096101 | A9497_RS05525 | 1071660 | 1072313 | 30S ribosomal protein S3                         |
| 1060633 | 1096101 | A9497_RS05530 | 1072326 | 1072670 | 50S ribosomal protein L22                        |
| 1060633 | 1096101 | A9497_RS05535 | 1072686 | 1072964 | 30S ribosomal protein S19                        |
| 1060633 | 1096101 | A9497_RS05540 | 1073058 | 1073891 | 50S ribosomal protein L2                         |
| 1060633 | 1096101 | A9497_RS05545 | 1073909 | 1074205 | 50S ribosomal protein L23                        |
| 1060633 | 1096101 | A9497_RS05550 | 1074205 | 1074828 | 50S ribosomal protein L4                         |
| 1060633 | 1096101 | A9497_RS05555 | 1074853 | 1075479 | 50S ribosomal protein L3                         |
| 1060633 | 1096101 | A9497_RS05560 | 1075596 | 1075904 | 30S ribosomal protein S10                        |
| 1060633 | 1096101 | A9497_RS05565 | 1076148 | 1077149 | Holliday junction DNA helicase RuvB              |

|         |         |               |         |         |                                       |
|---------|---------|---------------|---------|---------|---------------------------------------|
| 1060633 | 1096101 | A9497_RS05570 | 1077232 | 1079055 | acyltransferase                       |
| 1060633 | 1096101 | A9497_RS05575 | 1079052 | 1079462 | membrane protein                      |
| 1060633 | 1096101 | A9497_RS05580 | 1079459 | 1079893 | protein-tyrosine-phosphatase          |
| 1060633 | 1096101 | A9497_RS05585 | 1080176 | 1081468 | adenylosuccinate synthetase           |
| 1060633 | 1096101 | A9497_RS05590 | 1081723 | 1082239 | DNA topology modulation protein FlaR  |
| 1060633 | 1096101 | A9497_RS05595 | 1082529 | 1083698 | MFS transporter                       |
| 1060633 | 1096101 | A9497_RS05600 | 1083691 | 1084746 | bacteriocin biosynthesis protein      |
| 1060633 | 1096101 | A9497_RS05605 | 1085039 | 1085248 | hypothetical protein                  |
| 1060633 | 1096101 | A9497_RS05610 | 1085276 | 1086441 | transposase                           |
| 1060633 | 1096101 | A9497_RS05615 | 1086825 | 1087697 | MutR family transcriptional regulator |
| 1060633 | 1096101 | A9497_RS05620 | 1087782 | 1089941 | hypothetical protein                  |
| 1060633 | 1096101 | A9497_RS05625 | 1089946 | 1091514 | ABC transporter ATP-binding protein   |
| 1060633 | 1096101 | A9497_RS05630 | 1092429 | 1093127 | MutR family transcriptional regulator |
| 1060633 | 1096101 | A9497_RS05635 | 1093572 | 1094567 | radical SAM protein                   |
| 1060633 | 1096101 | A9497_RS05640 | 1094560 | 1096101 | ABC transporter ATP-binding protein   |
| 1081723 | 1098603 | A9497_RS05590 | 1081723 | 1082239 | DNA topology modulation protein FlaR  |
| 1081723 | 1098603 | A9497_RS05595 | 1082529 | 1083698 | MFS transporter                       |
| 1081723 | 1098603 | A9497_RS05600 | 1083691 | 1084746 | bacteriocin biosynthesis protein      |
| 1081723 | 1098603 | A9497_RS05605 | 1085039 | 1085248 | hypothetical protein                  |
| 1081723 | 1098603 | A9497_RS05610 | 1085276 | 1086441 | transposase                           |
| 1081723 | 1098603 | A9497_RS05615 | 1086825 | 1087697 | MutR family transcriptional regulator |
| 1081723 | 1098603 | A9497_RS05620 | 1087782 | 1089941 | hypothetical protein                  |
| 1081723 | 1098603 | A9497_RS05625 | 1089946 | 1091514 | ABC transporter ATP-binding protein   |
| 1081723 | 1098603 | A9497_RS05630 | 1092429 | 1093127 | MutR family transcriptional regulator |
| 1081723 | 1098603 | A9497_RS05635 | 1093572 | 1094567 | radical SAM protein                   |
| 1081723 | 1098603 | A9497_RS05640 | 1094560 | 1096101 | ABC transporter ATP-binding protein   |
| 1081723 | 1098603 | A9497_RS05645 | 1096505 | 1096864 | hypothetical protein                  |
| 1081723 | 1098603 | A9497_RS05650 | 1097198 | 1097380 | hypothetical protein                  |
| 1081723 | 1098603 | A9497_RS05655 | 1097426 | 1098403 | replication initiation protein        |
| 1081723 | 1098603 | A9497_RS05660 | 1098415 | 1098603 | hypothetical protein                  |
| 1116063 | 1130559 | A9497_RS05770 | 1116063 | 1116617 | hypothetical protein                  |
| 1116063 | 1130559 | A9497_RS05775 | 1117243 | 1117557 | diacylglycerol kinase                 |
| 1116063 | 1130559 | A9497_RS05780 | 1117867 | 1118504 | hypothetical protein                  |
| 1116063 | 1130559 | A9497_RS05785 | 1118548 | 1118919 | hypothetical protein                  |
| 1116063 | 1130559 | A9497_RS05790 | 1119509 | 1119748 | membrane protein                      |
| 1116063 | 1130559 | A9497_RS05795 | 1119811 | 1120377 | hypothetical protein                  |
| 1116063 | 1130559 | A9497_RS05800 | 1120390 | 1120560 | membrane protein                      |
| 1116063 | 1130559 | A9497_RS05805 | 1120575 | 1121132 | general stress protein                |
| 1116063 | 1130559 | A9497_RS05810 | 1121205 | 1121408 | CsbD family protein                   |
| 1116063 | 1130559 | A9497_RS05815 | 1122007 | 1122498 | phosphohydrolase                      |
| 1116063 | 1130559 | A9497_RS05820 | 1122815 | 1123990 | transposase                           |
| 1116063 | 1130559 | A9497_RS05825 | 1124160 | 1124487 | PadR family transcriptional regulator |
| 1116063 | 1130559 | A9497_RS05830 | 1124693 | 1125031 | hypothetical protein                  |
| 1116063 | 1130559 | A9497_RS05835 | 1125148 | 1125903 | hypothetical protein                  |

|         |         |               |         |         |                                             |
|---------|---------|---------------|---------|---------|---------------------------------------------|
| 1116063 | 1130559 | A9497_RS05840 | 1125940 | 1128309 | membrane protein                            |
| 1116063 | 1130559 | A9497_RS05845 | 1128438 | 1128977 | TetR family transcriptional regulator       |
| 1116063 | 1130559 | A9497_RS05850 | 1129055 | 1129417 | membrane protein                            |
| 1116063 | 1130559 | A9497_RS05855 | 1129948 | 1130559 | 30S ribosomal protein S4                    |
| 1179539 | 1195480 | A9497_RS06085 | 1179027 | 1179563 | transposase                                 |
| 1179539 | 1195480 | A9497_RS06090 | 1179539 | 1179733 | transposase                                 |
| 1179539 | 1195480 | A9497_RS06095 | 1179837 | 1180379 | transposase                                 |
| 1179539 | 1195480 | A9497_RS06205 | 1187230 | 1188060 | rod shape-determining protein MreC          |
| 1179539 | 1195480 | A9497_RS06210 | 1188062 | 1188586 | rod shape-determining protein MreD          |
| 1179539 | 1195480 | A9497_RS06215 | 1188671 | 1190038 | peptidoglycan hydrolase                     |
| 1179539 | 1195480 | A9497_RS06220 | 1190252 | 1191217 | ribose-phosphate pyrophosphokinase          |
| 1179539 | 1195480 | A9497_RS06225 | 1191232 | 1191411 | hypothetical protein                        |
| 1179539 | 1195480 | A9497_RS06230 | 1192324 | 1193499 | aminotransferase A                          |
| 1179539 | 1195480 | A9497_RS06235 | 1193486 | 1194259 | DNA repair protein RecO                     |
| 1179539 | 1195480 | A9497_RS06240 | 1194476 | 1195480 | phosphate acyltransferase                   |
| 1659186 | 1667221 | A9497_RS08735 | 1659186 | 1659539 | hypothetical protein                        |
| 1659186 | 1667221 | A9497_RS08740 | 1659779 | 1660024 | ABC transporter substrate-binding protein   |
| 1659186 | 1667221 | A9497_RS08745 | 1660086 | 1660339 | ABC transporter substrate-binding protein   |
| 1659186 | 1667221 | A9497_RS08750 | 1660608 | 1660847 | macrolide ABC transporter                   |
| 1659186 | 1667221 | A9497_RS08755 | 1660844 | 1661059 | hypothetical protein                        |
| 1659186 | 1667221 | A9497_RS08760 | 1661349 | 1661852 | 50S ribosomal protein L10                   |
| 1659186 | 1667221 | A9497_RS08765 | 1661927 | 1662295 | 50S ribosomal protein L7/L12                |
| 1659186 | 1667221 | A9497_RS08770 | 1662466 | 1662681 | hypothetical protein                        |
| 1659186 | 1667221 | A9497_RS08775 | 1662709 | 1663722 | transposase                                 |
| 1659186 | 1667221 | A9497_RS08780 | 1664572 | 1665228 | peptide ABC transporter ATP-binding protein |
| 1659186 | 1667221 | A9497_RS08785 | 1665250 | 1665603 | hypothetical protein                        |
| 1659186 | 1667221 | A9497_RS08790 | 1665651 | 1666520 | transposase                                 |
| 1659186 | 1667221 | A9497_RS08795 | 1666535 | 1667221 | transposase                                 |
| 1791414 | 1796026 | A9497_RS09425 | 1791414 | 1791961 | GNAT family acetyltransferase               |
| 1791414 | 1796026 | A9497_RS09430 | 1792141 | 1792707 | hypothetical protein                        |
| 1791414 | 1796026 | A9497_RS09435 | 1792887 | 1793069 | hypothetical protein                        |
| 1791414 | 1796026 | A9497_RS09440 | 1793551 | 1793778 | hypothetical protein                        |
| 1791414 | 1796026 | A9497_RS09445 | 1793816 | 1795049 | transposase                                 |
| 1791414 | 1796026 | A9497_RS09450 | 1795344 | 1795604 | transposase                                 |
| 1791414 | 1796026 | A9497_RS09455 | 1795601 | 1796026 | transposase                                 |
| 1845638 | 1851217 | A9497_RS09705 | 1845638 | 1846765 | hypothetical protein                        |
| 1845638 | 1851217 | A9497_RS09710 | 1846807 | 1847058 | hypothetical protein                        |
| 1845638 | 1851217 | A9497_RS09715 | 1847355 | 1848092 | hypothetical protein                        |
| 1845638 | 1851217 | A9497_RS09720 | 1848126 | 1849334 | hypothetical protein                        |
| 1845638 | 1851217 | A9497_RS09725 | 1849349 | 1851217 | NTPase                                      |

**Table S2.** Oligonucleotide primers used in detection of *prtS* of *S. thermophilus*

| <b>Gene</b> | <b>primer</b> | <b>Sequence</b>       |
|-------------|---------------|-----------------------|
| <i>priS</i> | PriSthF       | ATACCTGCACCTTGTTGGCG  |
|             | PriSthF       | GGTTTCTGTTGTTATTGCAGC |
